# Supplementary material for: Oligocene TEX 86 -derived seawater temperatures from offshore Wilkes Land (East Antarctica)
Source: Copernicus journal article supplement (doi:10.5194/cp-2017-153), 2017-12-14
Supplement: Supplementary file 1 [file cp-2017-153-supplement.pdf]

**Table S1:** concentrations of isoGDGTs and brGDGTs. All samples and corresponding depths, method used, isoprenoid and branched GDGT integrated values, TEX86 (Schouten et al., 2002) and BIT index values (Hopmans et al., 2004), Methane Index (MI) values (Zhang et al., 2011), GDGT-2/Crenarchaeol ratios (Weiwers et al., 2011), GDGT-0/Crenarchaeol ratios (Blaga et al., 2009) and GDGT-2/GDGT-3 ratios (Taylor et al., 2013), and #rings-tetra values (Sinninghe Damsté, 2016). Discarded samples based on BIT and #rings-tetra are indicated with an asterisk. Discarded samples with GDGT-0/Crenarchaeol ratio above 2.0 are indicated with a dagger, those with MI values above 0.3 are indicated with a 'double dagger', and those with GDGT-2/Crenarchaeol ratios above 0.4 with quotation marks. Discarded samples taken from mass waste deposits are underlined.

| Core | Section | Core interval (cm) | Cum. top depth (mbsf) | Cum. bottom depth (mbsf) | Used method | GDGT-0   | GDGT-1   | GDGT-2   | GDGT-3   | Cren     | Cren'    | GDGT-III | GDGT-II  | GDGT-I   | TEX86 | BIT  | Methane Index (MI) | GDGT-2/Cren | GDGT-0/Cren | GDGT-2/GDGT-3 | #rings-tetra |
|------|---------|--------------------|-----------------------|--------------------------|-------------|----------|----------|----------|----------|----------|----------|----------|----------|----------|-------|------|--------------------|-------------|-------------|---------------|--------------|
| 45R  | 1W      | 10-14              | 421.3                 | 421.34                   | HP/LC/MS    | 1.67E+08 | 7.89E+06 | 3.98E+06 | 1.04E+06 | 1.42E+08 | 1.58E+06 | 2.13E+06 | 1.93E+06 | 4.89E+06 | 0.455 | 0.06 | 0.082              | 0.028       | 1.176       | 3.827         |              |
| 45R  | 1W      | 18-20              | 421.38                | 421.4                    | HP/LC/MS    | 1.25E+08 | 6.03E+06 | 2.49E+06 | 7.85E+05 | 1.18E+08 | 1.23E+06 | 7.45E+06 | 4.62E+06 | 4.69E+06 | 0.428 | 0.12 | 0.072              | 0.021       | 1.059       | 3.172         |              |
| 45R  | 1W      | 40-44              | 421.6                 | 421.64                   | HP/LC/MS    | 1.33E+08 | 6.16E+06 | 2.51E+06 | 7.80E+05 | 1.15E+08 | 1.57E+06 | 1.78E+06 | 2.02E+06 | 4.15E+06 | 0.441 | 0.06 | 0.075              | 0.022       | 1.157       | 3.218         |              |
| 45R  | 1W      | 70-74              | 421.9                 | 421.94                   | HP/LC/MS    | 1.60E+08 | 7.28E+06 | 3.05E+06 | 1.00E+06 | 1.41E+08 | 2.22E+06 | 3.77E+06 | 1.17E+06 | 6.58E+06 | 0.463 | 0.12 | 0.073              | 0.022       | 1.135       | 3.050         |              |
| 46R  | 1W      | 20-22              | 431                   | 431.02                   | HP/LC/MS    | 9.62E+06 | 9.80E+05 | 6.17E+05 | 6.97E+04 | 6.62E+06 | 3.47E+05 | 5.23E+05 | 4.66E+05 | 7.08E+05 | 0.513 | 0.20 | 0.193              | 0.093       | 1.453       | 8.852         |              |
| 46R  | 1W      | 68-72              | 431.48                | 431.52                   | HP/LC/MS    | 6.06E+07 | 8.02E+06 | 5.52E+06 | 5.14E+05 | 5.04E+07 | 2.35E+06 | 2.62E+06 | 1.70E+06 | 1.95E+06 | 0.511 | 0.11 | 0.210              | 0.110       | 1.202       | 10.739        |              |
| 46R  | 2W      | 16-20              | 432.4                 | 432.44                   | HP/LC/MS    | 1.20E+08 | 4.23E+06 | 2.27E+06 | 2.04E+05 | 6.49E+06 | 3.92E+05 | 6.39E+06 | 5.63E+06 | 6.14E+06 | 0.404 | 0.74 | 0.493              | 0.350       | 18.490      | 11.127        |              |
| 46R  | 2W      | 120-124            | 433.44                | 433.48                   | HP/LC/MS    | 1.57E+07 | 1.59E+06 | 1.05E+06 | 1.35E+05 | 6.02E+06 | 4.41E+05 | 9.78E+05 | 6.64E+05 | 1.56E+06 | 0.506 | 0.35 | 0.300              | 0.174       | 2.608       | 7.778         |              |
| 46R  | 3W      | 72-76              | 434.44                | 434.48                   | HP/LC/MS    | 1.50E+08 | 7.28E+06 | 3.39E+06 | 1.02E+06 | 1.40E+08 | 2.24E+06 | 2.88E+06 | 5.48E+06 | 5.20E+06 | 0.477 | 0.09 | 0.076              | 0.024       | 1.071       | 3.324         |              |
| 47R  | 1W      | 21-25              | 440.61                | 440.65                   | HP/LC/MS    | 2.49E+08 | 1.36E+07 | 9.17E+06 | 1.04E+06 | 9.03E+07 | 4.97E+06 | 5.34E+05 | 2.59E+06 | 3.75E+06 | 0.527 | 0.07 | 0.200              | 0.102       | 2.757       | 8.817         |              |
| 47R  | 1W      | 89-93              | 441.29                | 441.33                   | HP/LC/MS    | 8.89E+05 | 4.75E+04 | 3.80E+03 | 2.97E+04 | 1.43E+05 | 6.74E+03 | 4.26E+05 | 1.02E+05 | 1.04E+05 | 0.458 | 0.84 | 0.352              | 0.208       | 6.232       | 7.809         | 0.405        |
| 47R  | 1W      | 117-121            | 441.57                | 441.61                   | HP/LC/MS    | 7.45E+07 | 3.93E+06 | 2.15E+06 | 3.31E+05 | 2.79E+07 | 1.63E+06 | 4.54E+06 | 2.35E+06 | 5.78E+06 | 0.511 | 0.31 | 0.178              | 0.077       | 2.670       | 6.495         |              |
| 47R  | 2W      | 5-9                | 441.91                | 441.95                   | UHPLC/MS    | 6.26E+06 | 3.29E+05 | 1.65E+05 | 3.37E+04 | 5.34E+06 | 7.92E+04 | 2.70E+05 | 2.19E+05 | 3.00E+05 | 0.458 | 0.13 | 0.089              | 0.031       | 1.173       | 4.895         | 0.180        |
| 47R  | 2W      | 69-73              | 442.55                | 442.59                   | UHPLC/MS    | 4.52E+07 | 2.11E+06 | 1.22E+06 | 2.23E+05 | 2.01E+07 | 8.01E+05 | 8.85E+06 | 1.62E+06 | 6.14E+06 | 0.515 | 0.45 | 0.145              | 0.061       | 2.249       | 5.471         |              |
| 47R  | 3W      | 9-13               | 443.41                | 443.45                   | UHPLC/MS    | 7.35E+06 | 3.29E+05 | 1.37E+05 | 3.81E+04 | 6.29E+06 | 8.80E+04 | 2.12E+05 | 2.35E+05 | 2.08E+05 | 0.444 | 0.09 | 0.073              | 0.022       | 1.168       | 3.588         | 0.540        |
| 47R  | 3W      | 17-21              | 443.47                | 443.51                   | HP/LC/MS    | 1.21E+07 | 5.47E+05 | 2.17E+05 | 6.87E+04 | 1.14E+07 | 1.61E+05 | 1.94E+05 | 2.23E+05 | 3.13E+05 | 0.450 | 0.06 | 0.067              | 0.019       | 1.067       | 3.157         |              |
| 47R  | 3W      | 20-24              | 443.52                | 443.56                   | HP/LC/MS    | 6.16E+07 | 2.98E+06 | 1.17E+06 | 4.09E+05 | 4.64E+07 | 6.76E+05 | 7.41E+05 | 9.26E+05 | 1.42E+06 | 0.431 | 0.06 | 0.088              | 0.025       | 1.328       | 2.861         |              |
| 47R  | 3W      | 72-76              | 444.04                | 444.08                   | UHPLC/MS    | 1.34E+06 | 1.26E+05 | 1.41E+05 | 5.17E+03 | 5.95E+05 | 2.28E+04 | 7.75E+04 | 1.01E+05 | 8.56E+04 | 0.573 | 0.31 | 0.306              | 0.237       | 2.247       | 27.279        | 0.292        |
| 47R  | 3W      | 85-89              | 444.17                | 444.21                   | HP/LC/MS    | 9.93E+05 | 8.77E+04 | 5.66E+04 | 8.00E+03 | 9.77E+05 | 2.51E+04 | 8.94E+04 | 3.76E+04 | 6.43E+04 | 0.506 | 0.16 | 0.132              | 0.058       | 1.016       | 7.074         |              |
| 47R  | 3W      | 118-122            | 444.46                | 444.5                    | HP/LC/MS    | 1.72E+07 | 7.21E+05 | 3.71E+05 | 1.85E+05 | 4.19E+06 | 2.38E+05 | 2.77E+06 | 2.97E+06 | 3.66E+06 | 0.524 | 0.69 | 0.224              | 0.089       | 4.105       | 2.005         |              |
| 48R  | 1W      | 5-9                | 449.95                | 449.99                   | HP/LC/MS    | 2.53E+06 | 2.41E+05 | 1.76E+05 | 2.44E+04 | 2.25E+06 | 1.01E+05 | 4.93E+04 | 6.70E+04 | 1.00E+05 | 0.556 | 0.09 | 0.158              | 0.078       | 1.126       | 7.213         |              |
| 48R  | 2W      | 19-21              | 451.59                | 451.63                   | HP/LC/MS    | 5.39E+06 | 5.20E+05 | 3.23E+05 | 5.33E+04 | 5.52E+06 | 1.88E+05 | 1.37E+05 | 2.01E+05 | 2.38E+05 | 0.520 | 0.09 | 0.136              | 0.059       | 0.977       | 6.059         |              |
| 48R  | 2W      | 128-132            | 452.68                | 452.72                   | HP/LC/MS    | 2.75E+06 | 2.61E+05 | 1.55E+05 | 2.84E+04 | 2.93E+06 | 1.20E+05 | 8.02E+04 | 7.53E+04 | 1.26E+05 | 0.537 | 0.09 | 0.127              | 0.053       | 0.938       | 5.459         |              |
| 48R  | 3W      | 76-80              | 453.66                | 453.7                    | HP/LC/MS    | 3.89E+06 | 2.48E+05 | 1.25E+05 | 2.81E+04 | 3.43E+06 | 9.61E+04 | 1.05E+05 | 1.50E+05 | 8.51E+04 | 0.501 | 0.09 | 0.102              | 0.036       | 1.136       | 4.434         |              |
| 50R  | 1W      | 24-30              | 469.24                | 469.3                    | HP/LC/MS    | 2.87E+06 | 1.79E+05 | 8.79E+04 | 2.15E+04 | 2.95E+06 | 5.98E+04 | 9.11E+04 | 1.15E+05 | 1.68E+05 | 0.487 | 0.11 | 0.087              | 0.030       | 0.976       | 4.091         |              |
| 50R  | CCW     | 0-4                | 469.645               | 469.685                  | HP/LC/MS    | 2.71E+06 | 1.65E+05 | 8.06E+04 | 2.18E+04 | 2.67E+06 | 6.30E+04 | 8.31E+04 | 1.34E+05 | 1.55E+05 | 0.501 | 0.12 | 0.089              | 0.030       | 1.016       | 3.700         |              |
| 51R  | 1W      | 82-86              | 479.42                | 479.46                   | HP/LC/MS    | 2.46E+06 | 1.36E+05 | 7.58E+04 | 1.73E+04 | 2.44E+06 | 7.46E+04 | 8.28E+04 | 1.17E+05 | 1.04E+05 | 0.552 | 0.12 | 0.084              | 0.031       | 1.007       | 4.394         |              |
| 51R  | 1W      | 140-144            | 480                   | 480.04                   | UHPLC/MS    | 4.61E+06 | 4.23E+05 | 2.51E+05 | 3.81E+04 | 3.13E+06 | 1.51E+05 | 8.08E+04 | 9.71E+04 | 2.79E+05 | 0.510 | 0.13 | 0.178              | 0.080       | 1.473       | 6.588         | 0.485        |
| 51R  | 1W      | 145-149            | 480.05                | 480.09                   | UHPLC/MS    | 2.54E+06 | 2.28E+05 | 1.36E+05 | 1.26E+04 | 1.66E+06 | 6.33E+04 | 1.10E+05 | 6.03E+04 | 4.79E+04 | 0.482 | 0.12 | 0.180              | 0.082       | 1.533       | 10.796        | 0.184        |
| 51R  | 2W      | 20-22              | 480.3                 | 480.32                   | HP/LC/MS    | 1.53E+06 | 1.52E+05 | 9.91E+04 | 1.07E+04 | 1.03E+06 | 4.99E+04 | 1.43E+05 | 6.52E+04 | 5.83E+04 | 0.512 | 0.21 | 0.196              | 0.097       | 1.489       | 9.231         |              |
| 51R  | 2W      | 46-50              | 480.56                | 480.6                    | UHPLC/MS    | 6.29E+05 | 4.17E+04 | 2.98E+04 | 3.36E+03 | 2.63E+05 | 1.48E+04 | 2.70E+04 | 3.27E+04 | 2.43E+04 | 0.535 | 0.24 | 0.213              | 0.114       | 2.393       | 8.878         | 0.218        |
| 51R  | CCW     | 10-14              | 480.98                | 481.02                   | UHPLC/MS    | 1.33E+06 | 1.43E+05 | 1.12E+05 | 1.04E+04 | 1.00E+06 | 5.64E+04 | 0.00E+00 | 0.00E+00 | 0.00E+00 | 0.555 | 0.00 | 0.201              | 0.112       | 1.331       | 10.707        |              |
| 52R  | CCW     | 9-13               | 488.29                | 488.33                   | HP/LC/MS    | 3.58E+06 | 3.29E+05 | 1.98E+05 | 2.87E+04 | 4.23E+06 | 1.13E+05 | 1.45E+05 | 2.03E+05 | 1.66E+05 | 0.508 | 0.11 | 0.113              | 0.047       | 0.845       | 6.893         |              |
| 53R  | 1W      | 20-22              | 498                   | 498.02                   | HP/LC/MS    | 3.87E+06 | 4.31E+05 | 2.14E+05 | 6.25E+04 | 9.29E+06 | 1.03E+05 | 3.15E+05 | 5.40E+05 | 5.14E+05 | 0.468 | 0.13 | 0.070              | 0.023       | 1.038       | 3.419         |              |
| 53R  | 1W      | 85-89              | 498.65                | 498.69                   | HP/LC/MS    | 1.05E+07 | 5.08E+05 | 2.36E+05 | 6.76E+04 | 1.01E+07 | 1.64E+05 | 2.51E+05 | 8.27E+05 | 4.73E+05 | 0.479 | 0.13 | 0.073              | 0.023       | 1.035       | 3.490         |              |
| 53R  | 2W      | 84-88              | 500.09                | 500.13                   | HP/LC/MS    | 2.98E+06 | 1.85E+05 | 8.65E+04 | 2.13E+04 | 3.02E+06 | 4.85E+04 | 1.04E+05 | 1.15E+05 | 1.29E+05 | 0.458 | 0.10 | 0.087              | 0.029       | 0.985       | 4.067         |              |
| 54R  | 1W      | 87-91              | 508.27                | 508.31                   | HP/LC/MS    | 2.19E+06 | 1.56E+05 | 1.03E+05 | 1.67E+04 | 2.14E+06 | 5.00E+04 | 7.54E+04 | 1.18E+05 | 1.09E+05 | 0.522 | 0.12 | 0.112              | 0.048       | 1.021       | 6.156         |              |
| 54R  | 3W      | 0-4                | 510.09                | 510.13                   | HP/LC/MS    | 4.42E+06 | 3.06E+05 | 1.47E+05 | 3.06E+04 | 4.25E+06 | 8.77E+04 | 1.36E+05 | 1.44E+05 | 2.00E+05 | 0.465 | 0.10 | 0.100              | 0.035       | 1.038       | 4.814         |              |
| 55R  | 1W      | 15-19              | 517.15                | 517.19                   | UHPLC/MS    | 1.25E+06 | 1.02E+05 | 7.95E+04 | 7.23E+03 | 6.42E+05 | 4.61E+04 | 1.29E+05 | 1.12E+05 | 1.45E+05 | 0.566 | 0.38 | 0.215              | 0.124       | 1.950       | 10.988        | 0.199        |
| 57R  | 1W      | 4-8                | 535.84                | 535.88                   | UHPLC/MS    | 2.50E+07 | 1.13E+06 | 3.85E+05 | 1.57E+05 | 2.08E+07 | 3.96E+05 | 8.24E+05 | 1.12E+06 | 9.58E+05 | 0.454 | 0.12 | 0.073              | 0.019       | 1.203       | 2.447         |              |
| 57R  | 1W      | 80-84              | 536.6                 | 536.64                   | UHPLC/MS    | 9.68E+05 | 7.60E+04 | 6.37E+04 | 1.32E+04 | 5.73E+05 | 2.88E+04 | 2.56E+04 | 1.42E+04 | 1.39E+04 | 0.582 | 0.09 | 0.203              | 0.111       | 1.689       | 4.816         | 0.310        |
| 57R  | 2W      | 45-49              | 537.56                | 537.6                    | UHPLC/MS    | 5.74E+06 | 5.75E+05 | 3.29E+05 | 3.51E+04 | 4.53E+06 | 2.05E+05 | 1.37E+05 | 1.37E+05 | 1.16E+05 | 0.497 | 0.08 | 0.165              | 0.073       | 1.266       | 9.365         | 0.170        |
| 57R  | 2W      | 75-79              | 537.86                | 537.9                    | UHPLC/MS    | 7.16E+06 | 5.00E+05 | 2.66E+05 | 3.97E+04 | 5.62E+06 | 1.21E+05 | 2.85E+05 | 1.91E+05 | 1.58E+05 | 0.461 | 0.10 | 0.123              | 0.047       | 1.274       | 6.699         | 0.363        |
| 58R  | 1W      | 14-18              | 545.54                | 545.58                   | UHPLC/MS    | 3.01E+06 | 3.50E+05 | 2.53E+05 | 1.91E+04 | 2.72E+06 | 1.55E+05 | 1.03E+05 | 6.14E+04 | 3.89E+04 | 0.549 | 0.07 | 0.178              | 0.093       | 1.110       | 13.294        |              |
| 59R  | 1W      | 17-19              | 555.17                | 555.19                   | HP/LC/MS    | 6.89E+05 | 3.29E+04 | 1.57E+04 | 5.44E+03 | 7.45E+05 | 7.59E+03 | 2.05E+04 | 1.18E+04 | 2.92E+04 | 0.466 | 0.08 | 0.067              | 0.021       | 0.924       | 2.898         |              |
| 59R  | CCW     | 16-20              | 556.56                | 556.6                    | UHPLC/MS    | 1.02E+06 | 1.02E+05 | 7.95E+04 | 9.24E+03 | 7.10E+05 | 4.97E+04 | 9.85E+04 | 6.02E+04 | 6.12E+04 | 0.575 | 0.24 | 0.201              | 0.112       | 1.441       | 8.602         | 0.125        |
| 60R  | 2W      | 19-21              | 565.8                 | 565.82                   | HP/LC/MS    | 3.87E+06 | 1.65E+05 | 6.59E+04 | 2.46E+04 | 4.03E+06 | 3.83E+04 | 1.02E+05 | 1.58E+05 | 1.51E+05 | 0.439 | 0.09 | 0.059              | 0.016       | 0.937       | 2.677         |              |
| 62R  | CCW     | 27-31              | 584.07                | 584.11                   | UHPLC/MS    | 6.66E+05 | 4.50E+04 | 2.50E+04 | 4.26E+03 | 5.74E+05 | 1.75E+04 | 3.08E+04 | 2.00E+04 | 2.09E+04 | 0.510 | 0.11 | 0.112              | 0.044       | 1.161       | 5.862         | 0.268        |
| 63R  | 2W      | 17-19              | 594.95                | 594.97                   | HP/LC/MS    | 1.32E+06 | 1.09E+05 | 6.96E+04 | 1.16E+04 | 1.59E+06 | 4.50E+04 | 4.98E+04 | 5.83E+04 | 8.41E+04 | 0.537 | 0.11 | 0.104              | 0.044       | 0.830       | 5.981         |              |
| 63R  | 4W      | 19-21              | 597.54                | 597.58                   | HP/LC/MS    | 6.34E+06 | 4.62E+05 | 2.38E+05 | 4.75E+04 |          |          |          |          |          |       |      |                    |             |             |               |              |

**Table S2:** Comparison between TEX86 and temperature values derived from samples analyzed with both HPLC/MS and UHPLC/MS.

| Core    | Section | Core interval (cm) | average cum. depth (mbsf) | TEX86 on HPLC/MS | TEX86 on UHPLC/MS | $\Delta$ TEX86 | $\Delta$ SST (lin. cal. Kim et al., 2010) | $\Delta$ SST (TEX86H cal. Kim et al., 2010) |
|---------|---------|--------------------|---------------------------|------------------|-------------------|----------------|-------------------------------------------|---------------------------------------------|
| 48R     | 2W      | 19-21              | 451.6                     | 0.520            | 0.504             | 0.016          | 0.998                                     | 0.930                                       |
| 63R     | 4W      | 19-21              | 597.55                    | 0.494            | 0.506             | 0.011          | 0.744                                     | 0.677                                       |
| 70R     | 3W      | 21-23              | 663.67                    | 0.500            | 0.510             | 0.010          | 0.625                                     | 0.574                                       |
| 84R     | 6W      | 40-44              | 802.79                    | 0.556            | 0.547             | 0.008          | 0.449                                     | 0.450                                       |
| 92R     | 3W      | 2-6                | 874.06                    | 0.507            | 0.499             | 0.009          | 0.568                                     | 0.520                                       |
| Average |         |                    |                           |                  |                   | 0.011          | 0.677                                     | 0.630                                       |

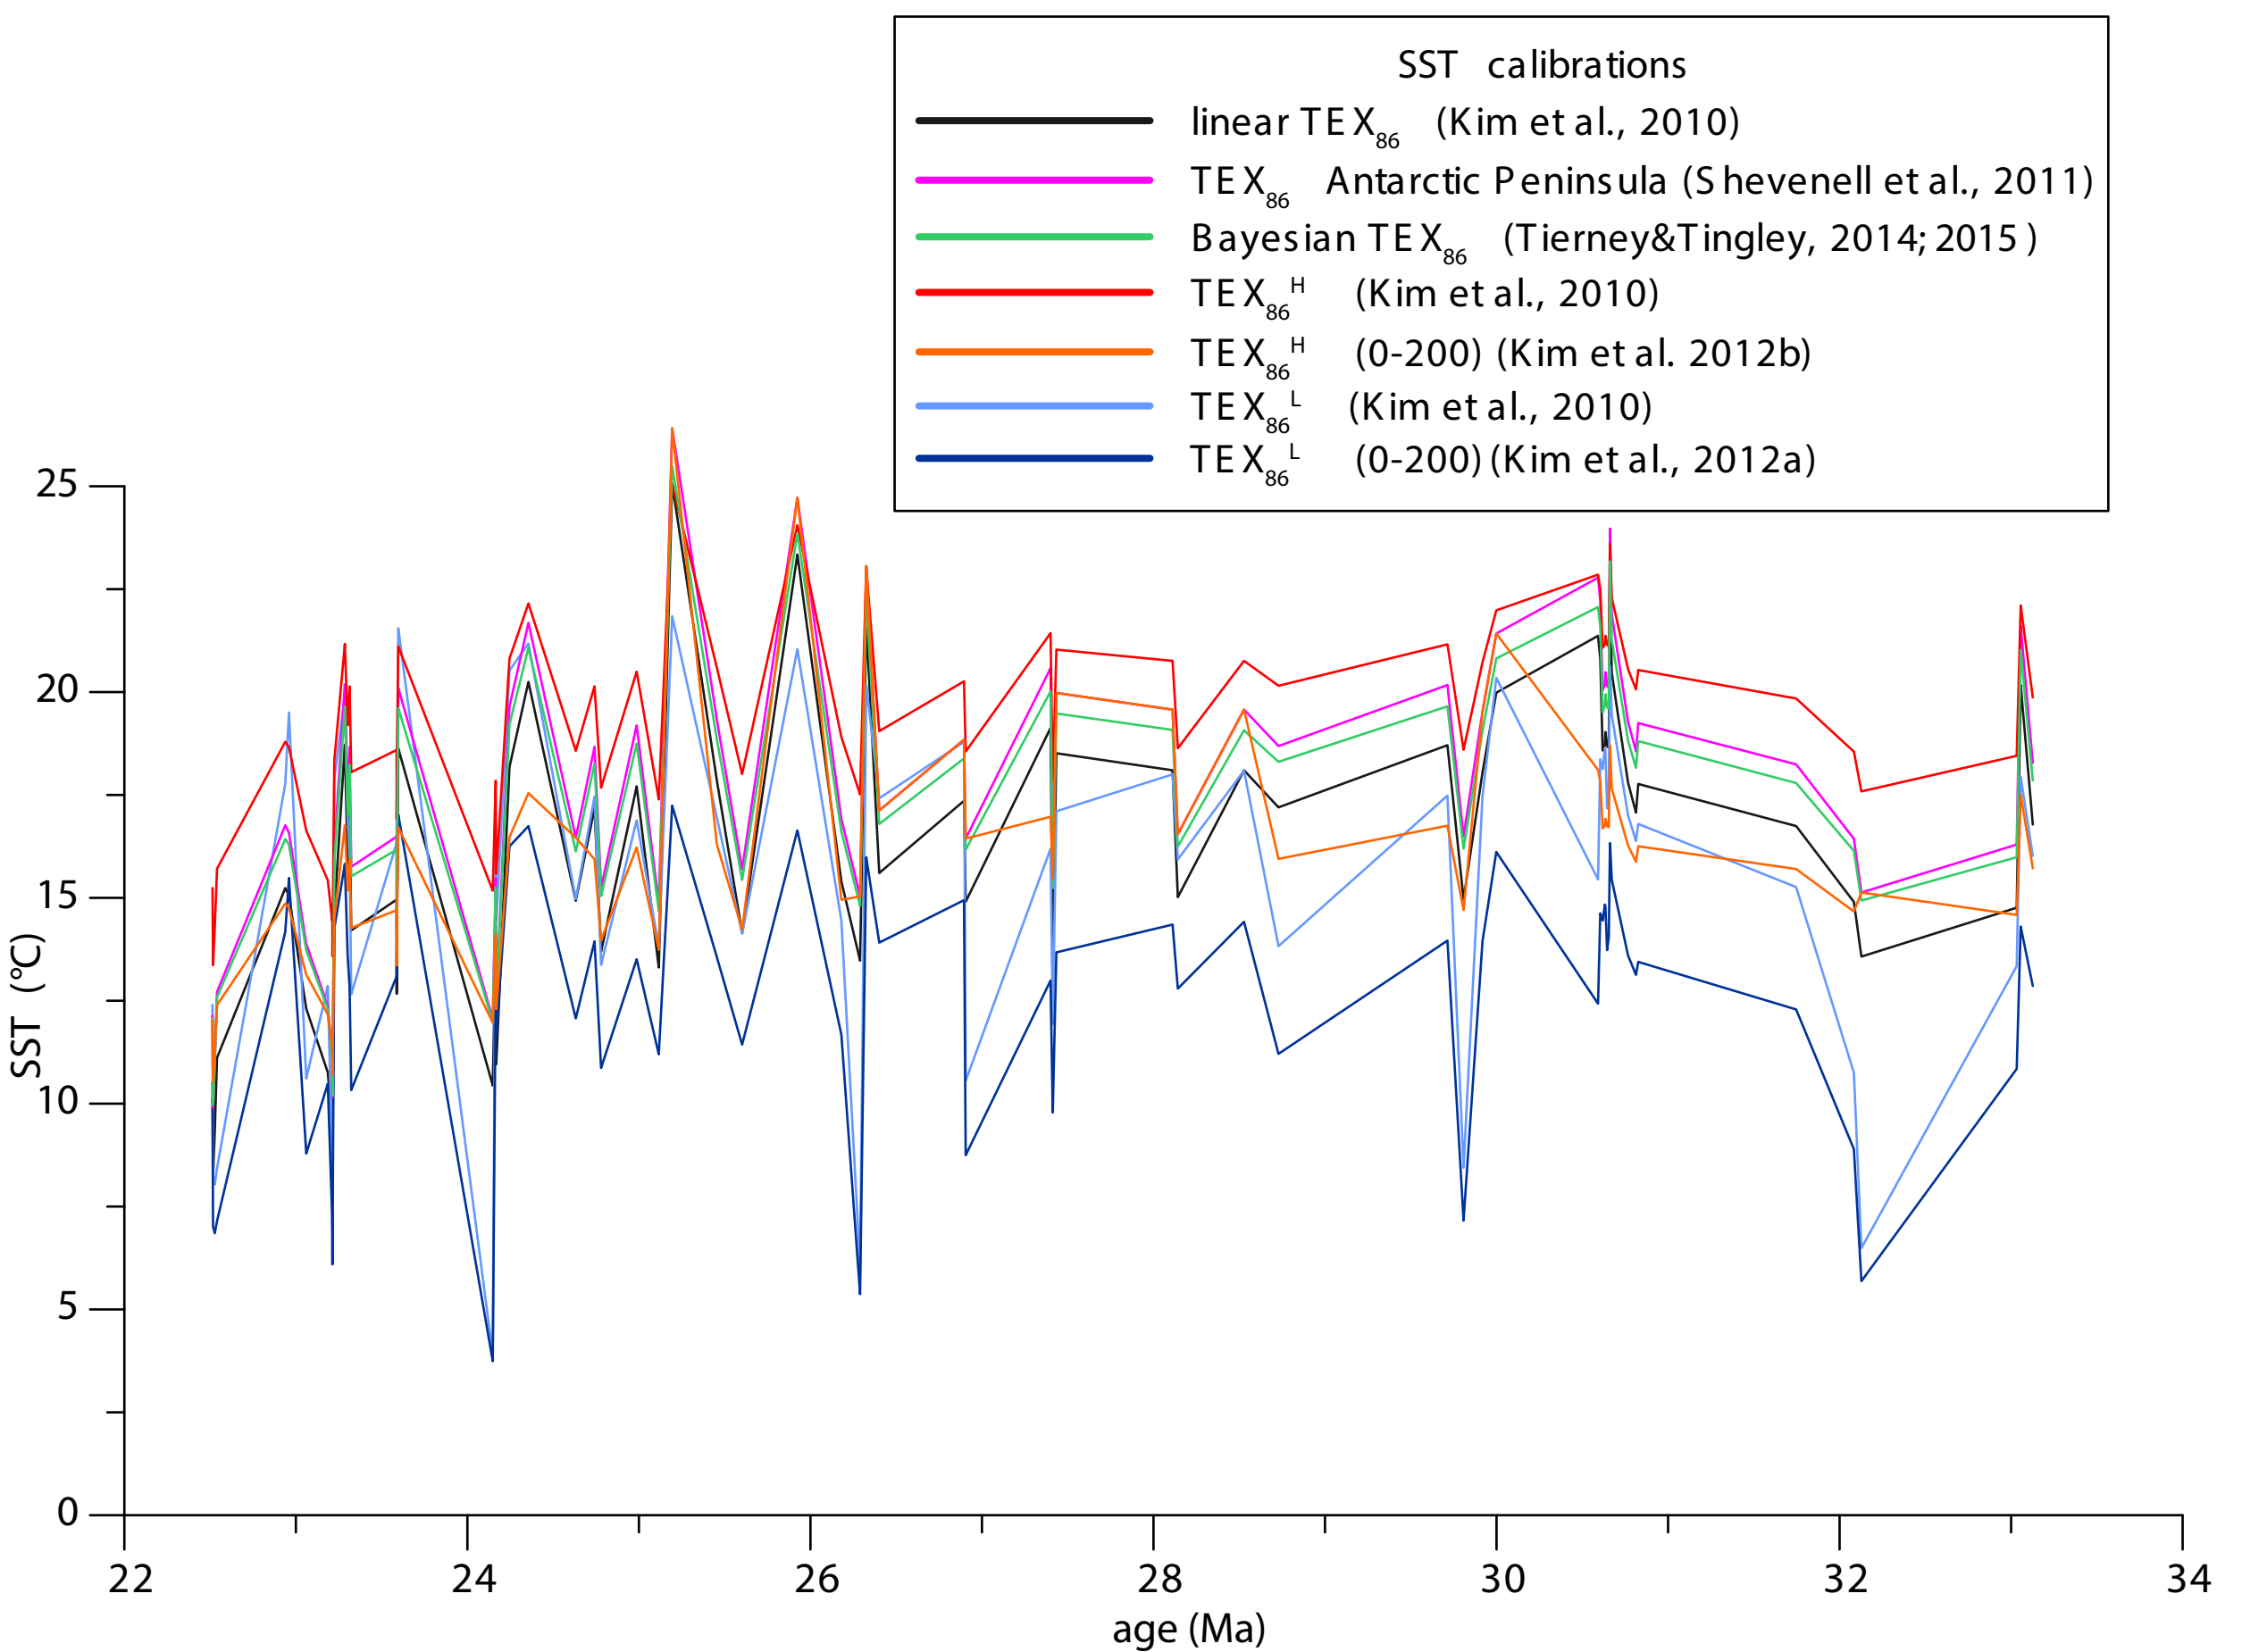

**Figure S1:** All surface water and 0-200 m depth-integrated temperature reconstructions using the  $\text{TEX}_{86}$ ,  $\text{TEX}_{86}^{\text{L}}$  and  $\text{TEX}_{86}^{\text{H}}$  seawater temperature proxies plotted against age.

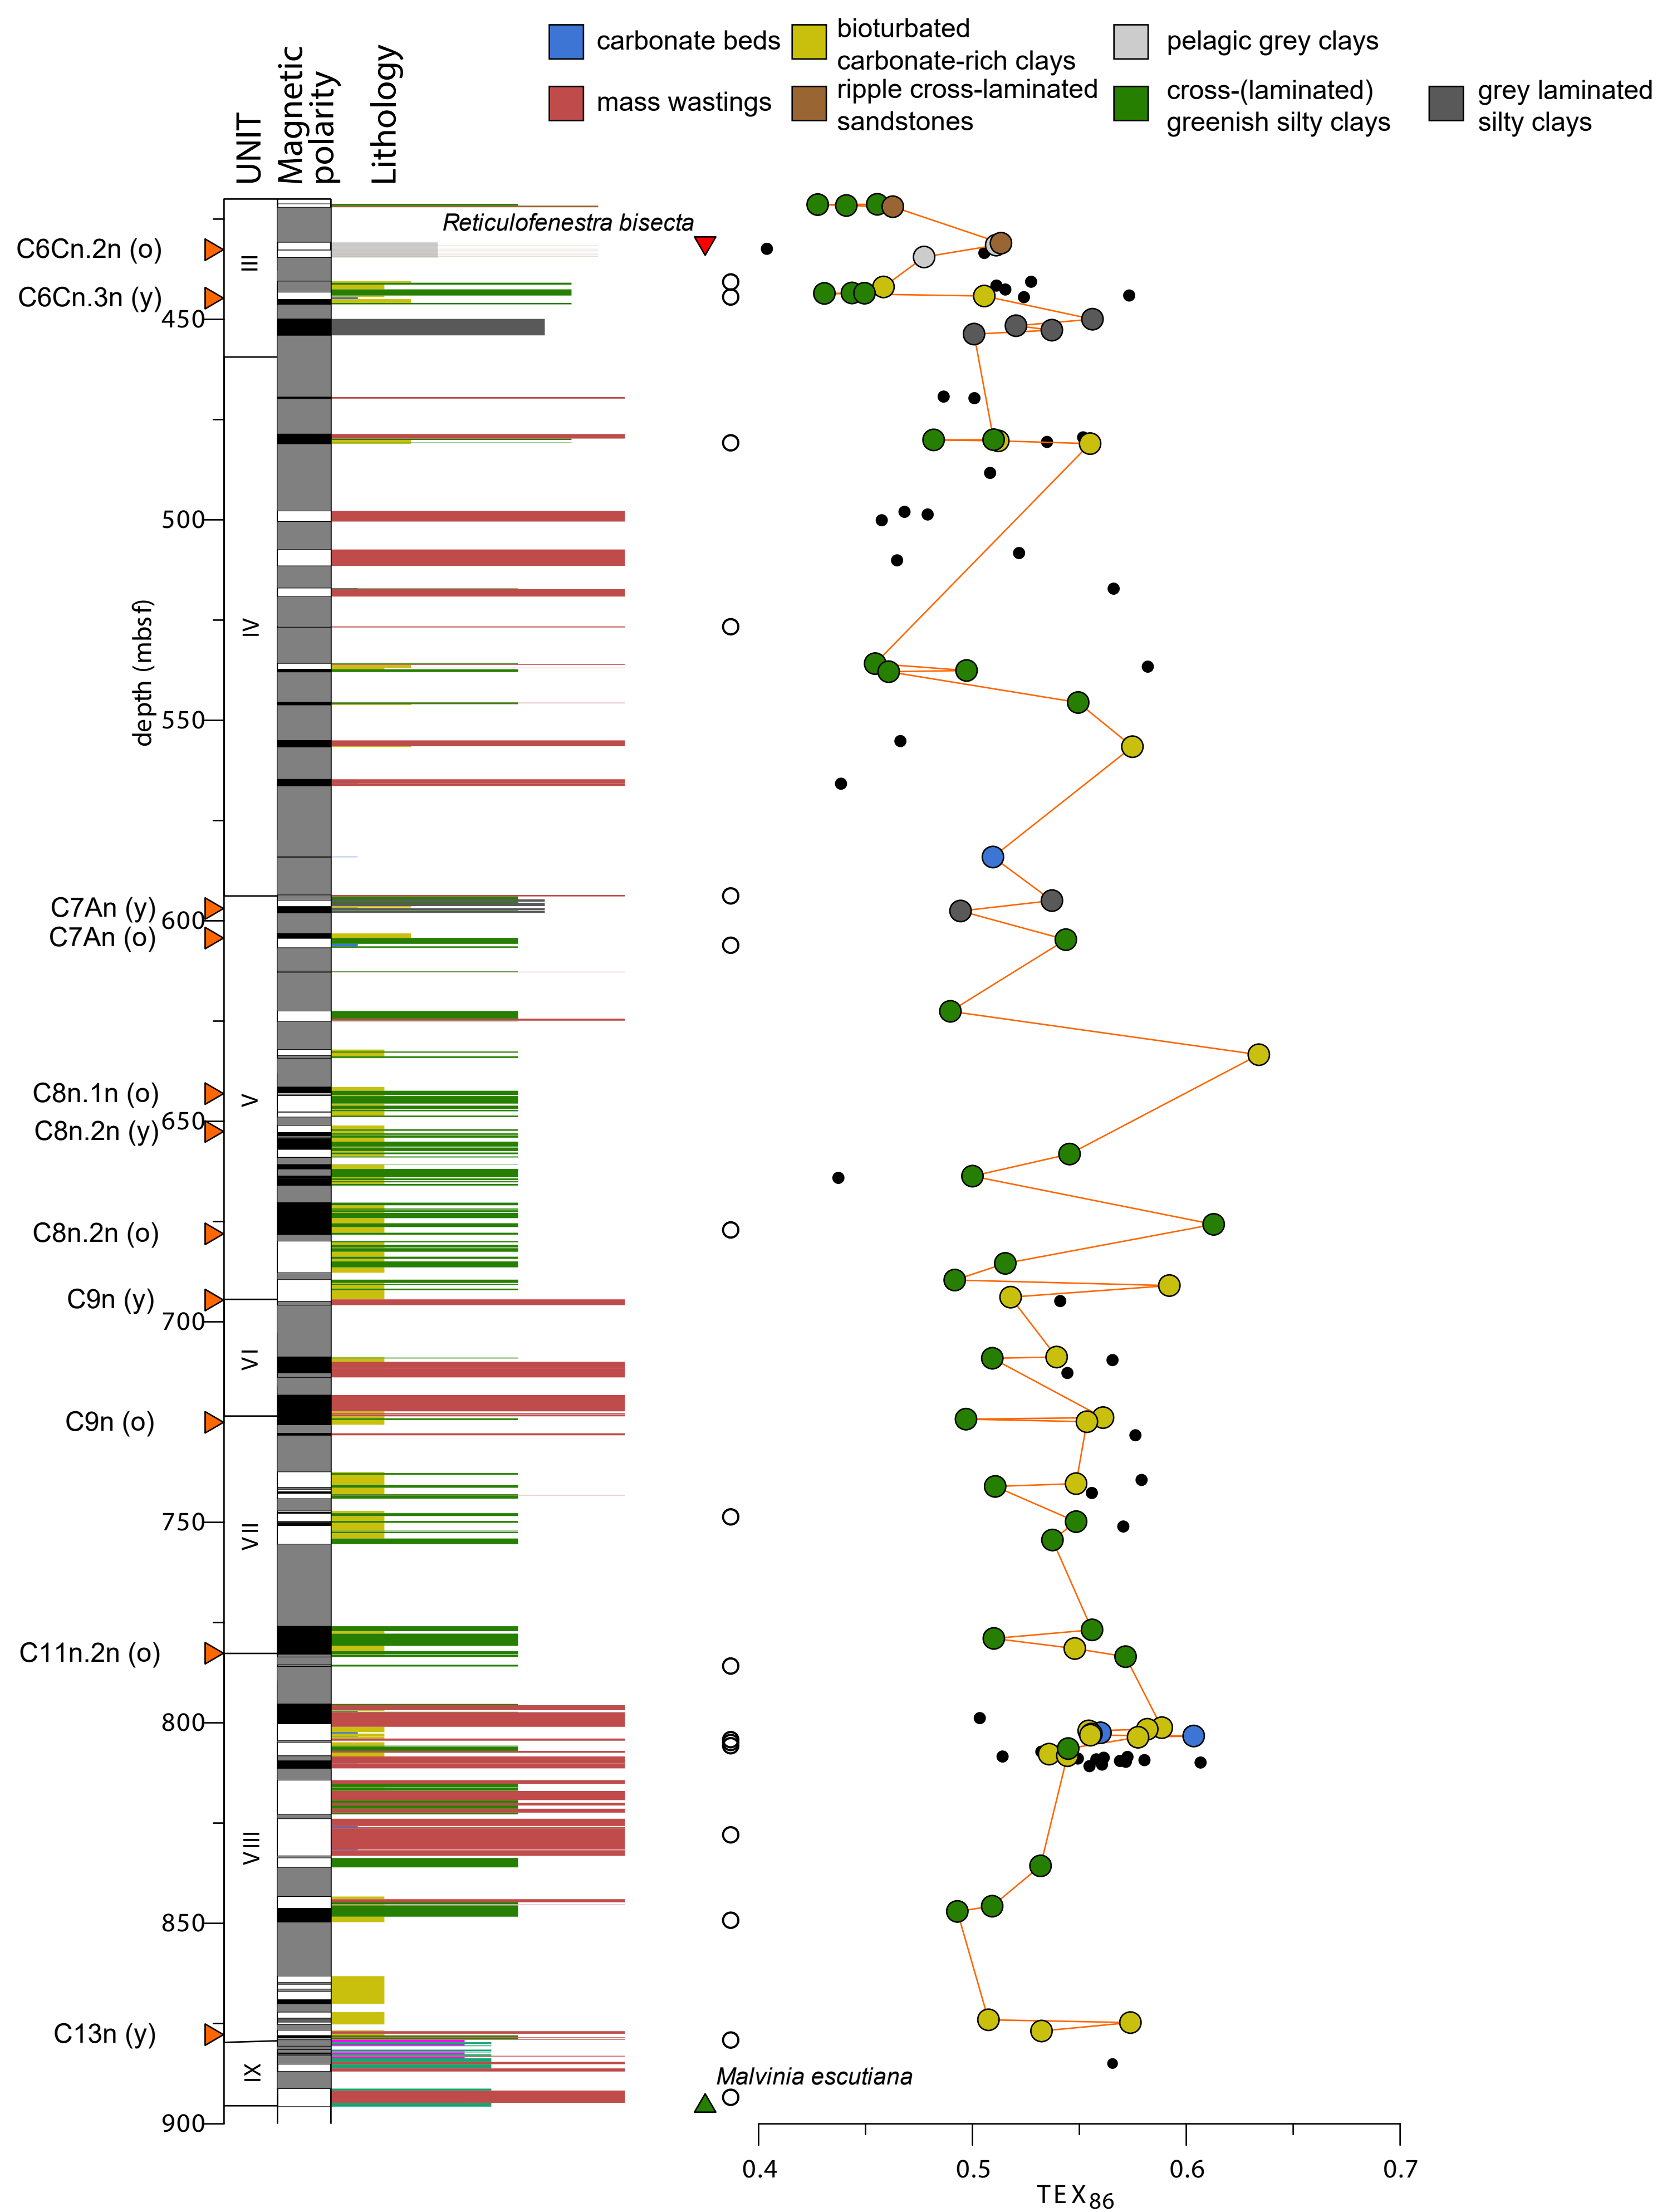

**Figure S2:** As Figure 2, but with black dots indicating TEX<sub>86</sub> values from samples that have been discarded for temperature reconstruction. Furthermore, open circles indicate the position of samples taken that did not provide sufficient amounts of GDGTs for reliable TEX<sub>86</sub> values.
